# Supplementary figures and images for: Neutrophil-Derived IL-6 Potentially Drives Ferroptosis Resistance in B Cells in Lupus Kidney
Source: Hindawi journal article supplement (doi:10.1155/2023/9810733), 2023-05-27

Supplementary figure 1

A

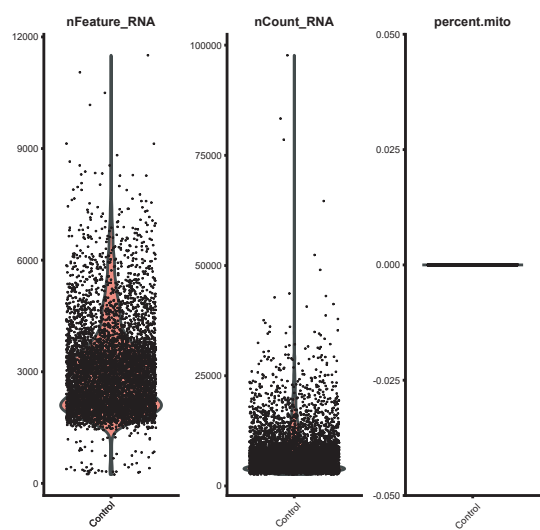

B

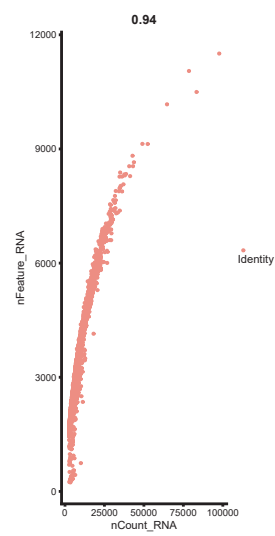

C

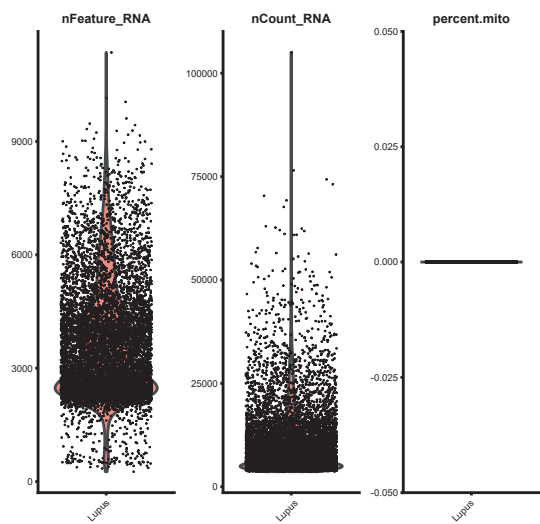

D

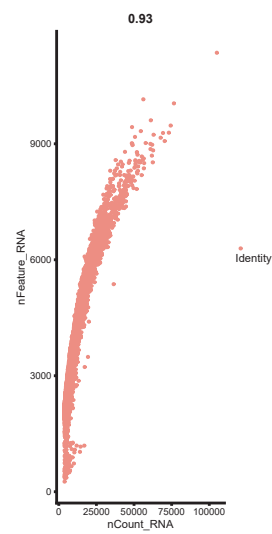

Supplement: f1 [file 9810733.f1.zip]

Supplementary figure 4

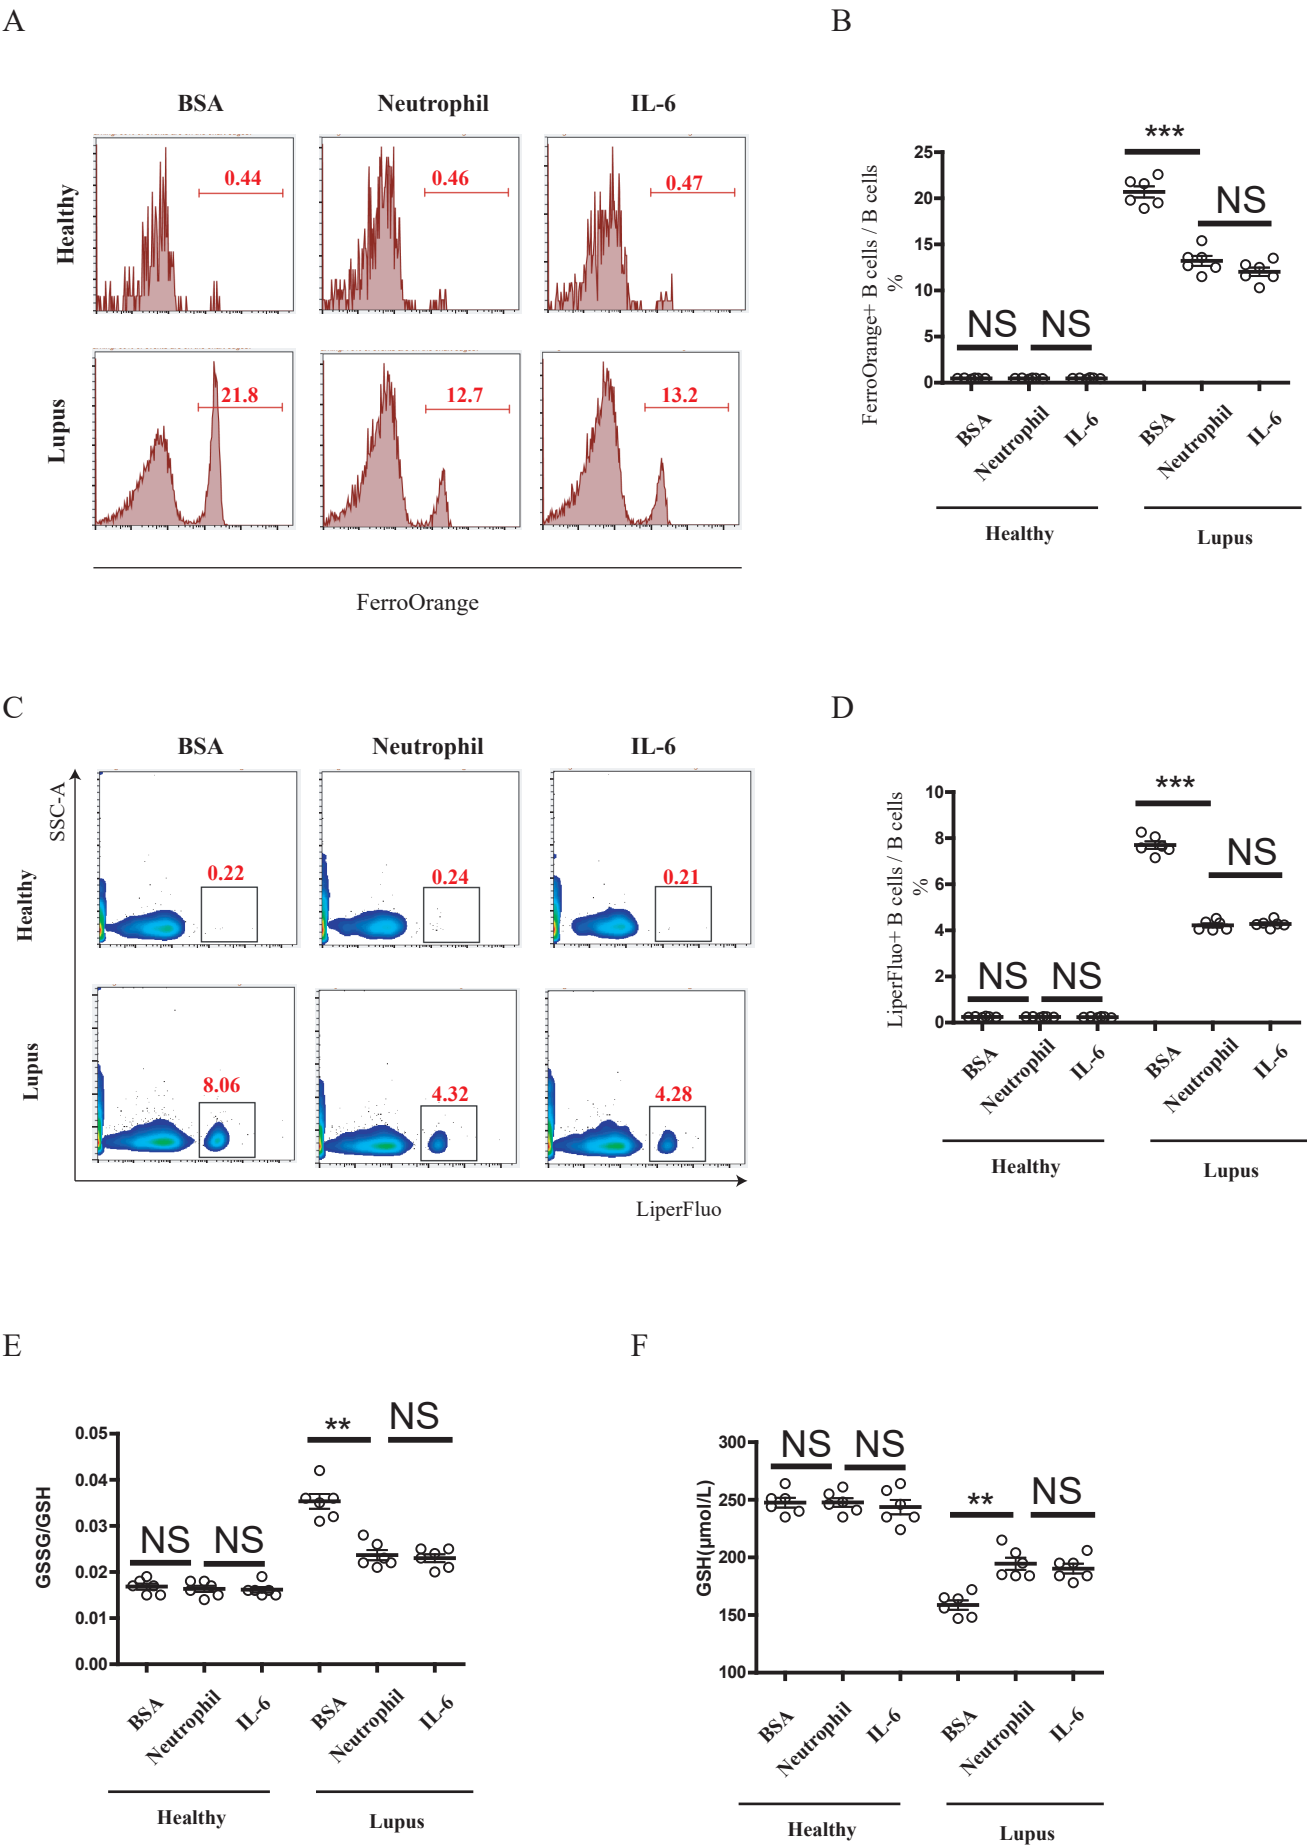

Supplement: f1 [file 9810733.f1.zip]

## Supplementary figure 2

A

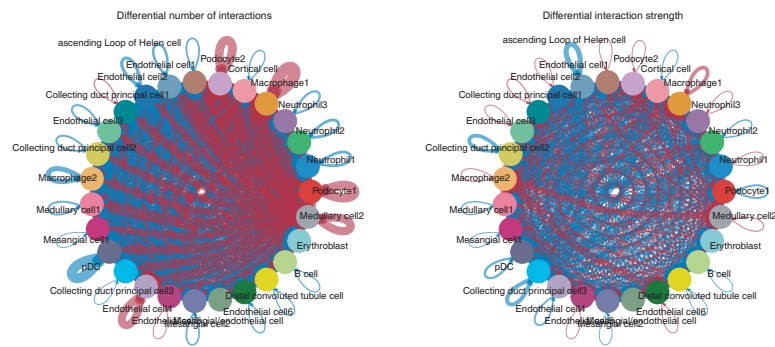

B

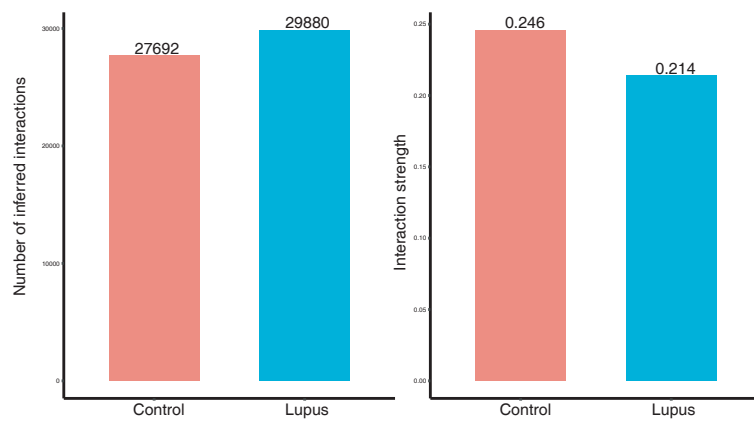

Supplement: f1 [file 9810733.f1.zip]

Supplementary figure 5

A

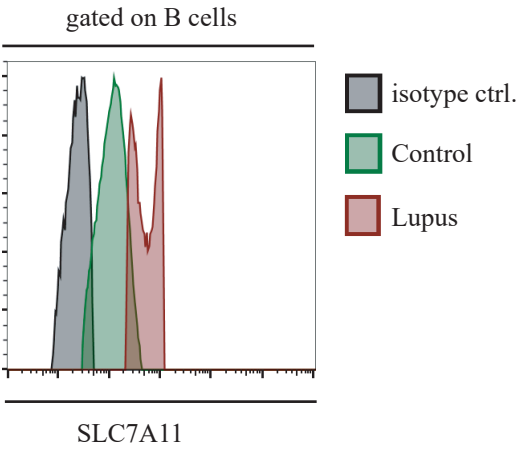

B

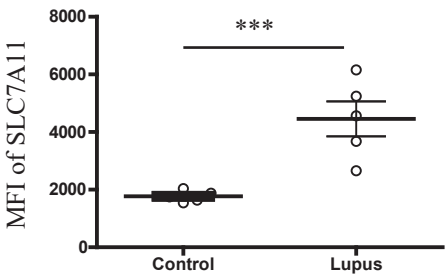

Supplement: f1 [file 9810733.f1.zip]

Supplementary figure 3

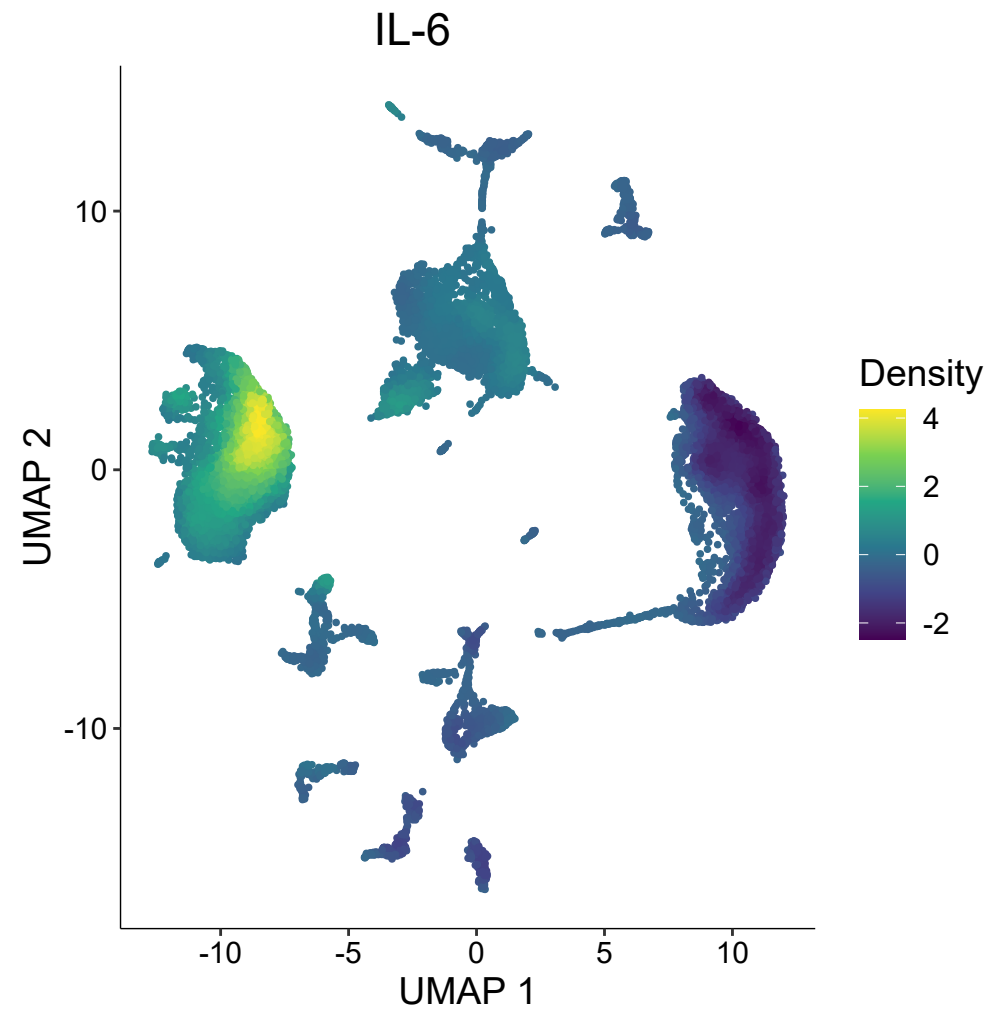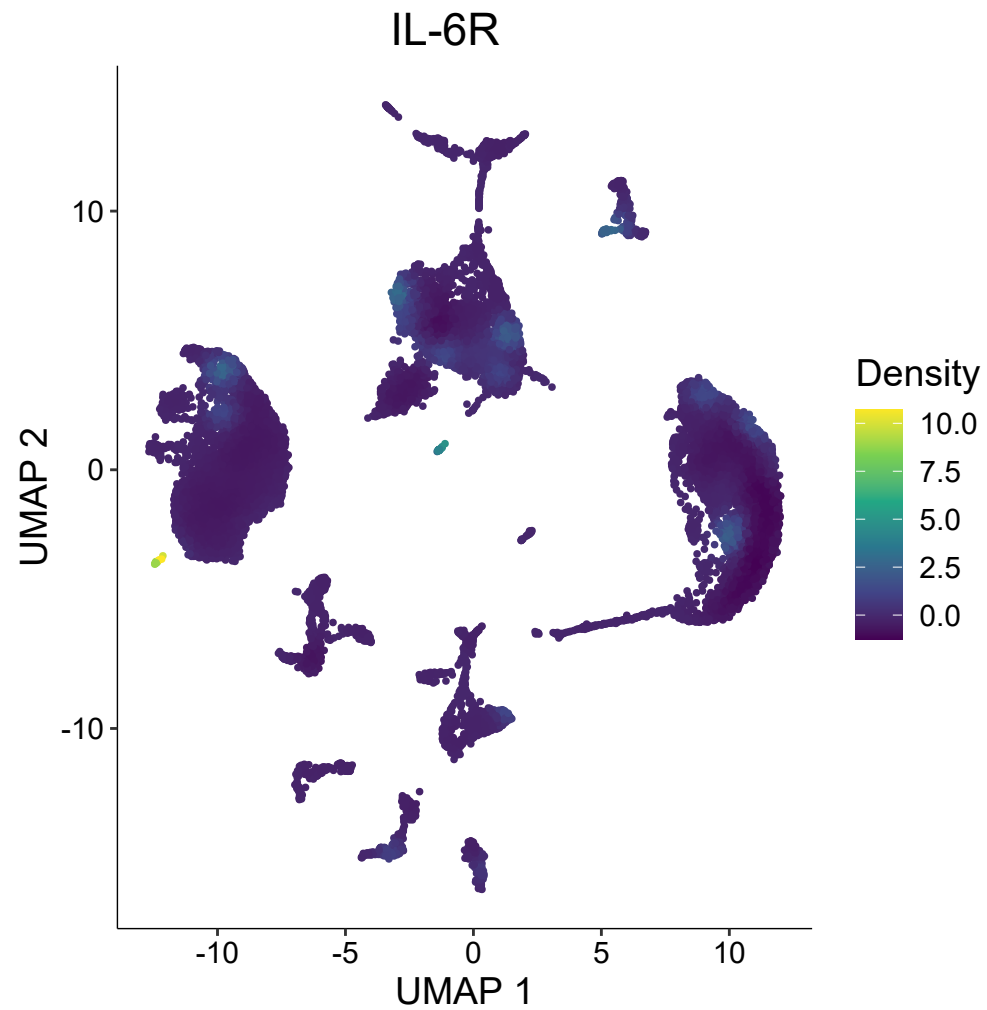

Supplement: f1 [file 9810733.f1.zip]

**Supplementary figure 6**

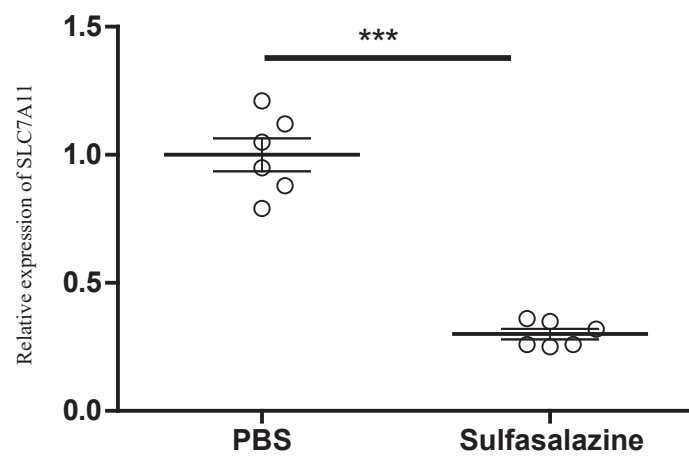

Supplement: f1 [file 9810733.f1.zip]
